# Supplementary material for: Erratum to: DNA methylome profiling of human tissues identifies global and tissue-specific methylation patterns
Source: PubMed Central journal article supplement (PMC5090885; doi:10.1186/s13059-016-1091-0), 2016-11-01

**SPN**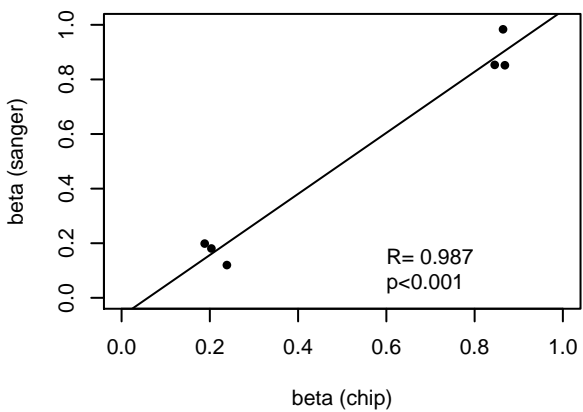**RUNX1**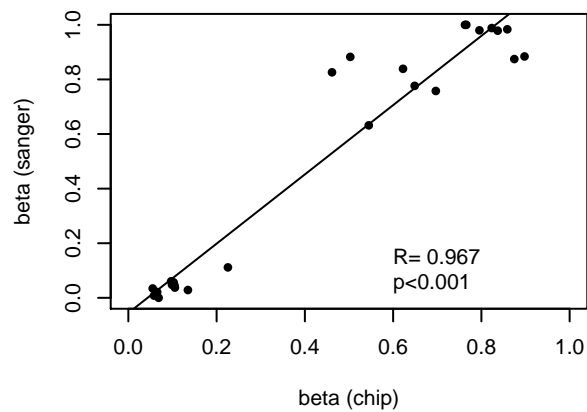**RHOH**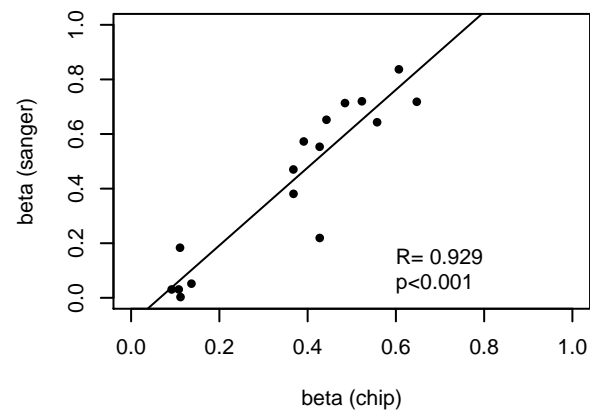**PTPN22**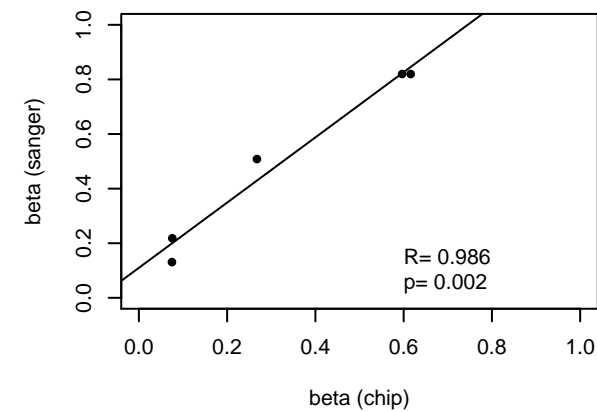**PRDM16**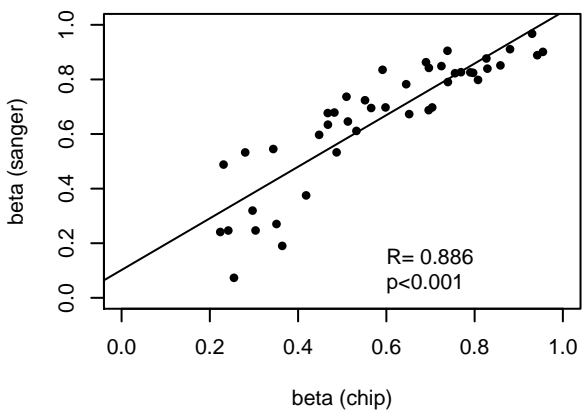**PLEK**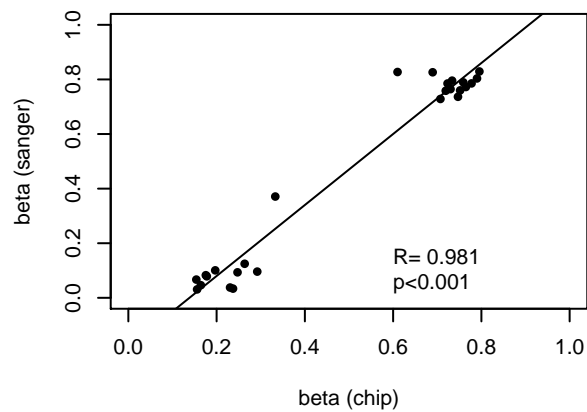**LMO2**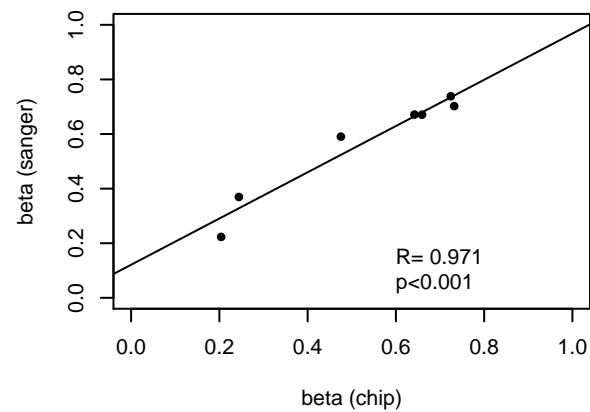**KIRREL3**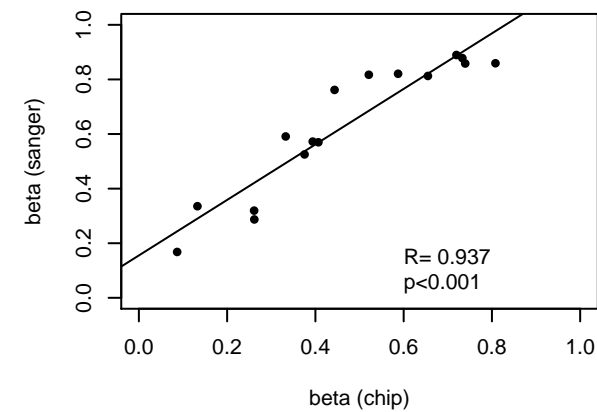**KALRN**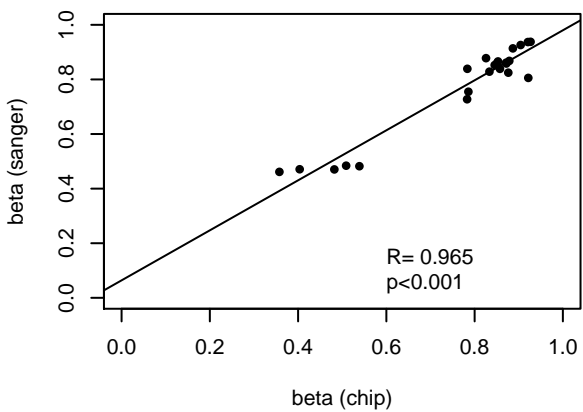**HCLS**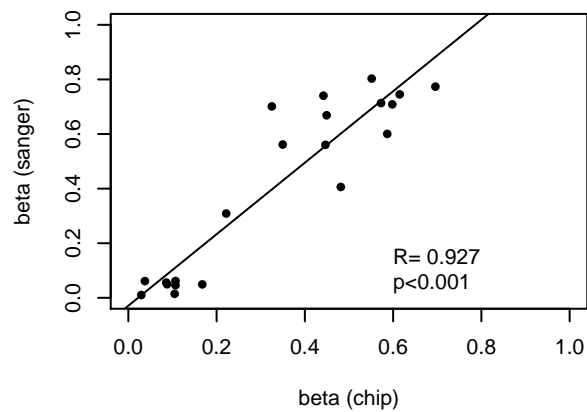**ENPEP**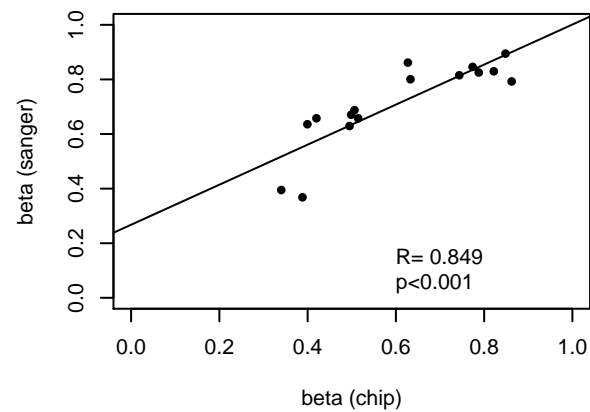**CPLX1**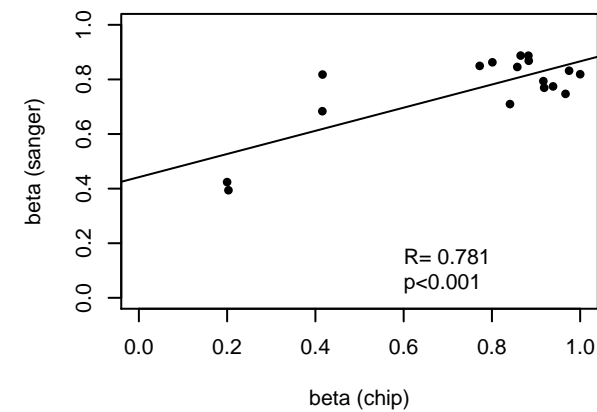**CDK6**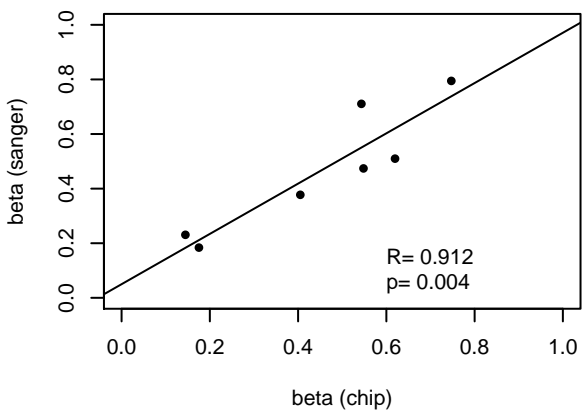**ANGPT2**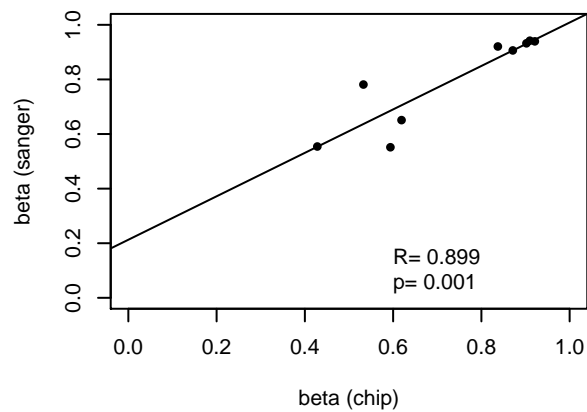**0% and 100% methylated CpGs**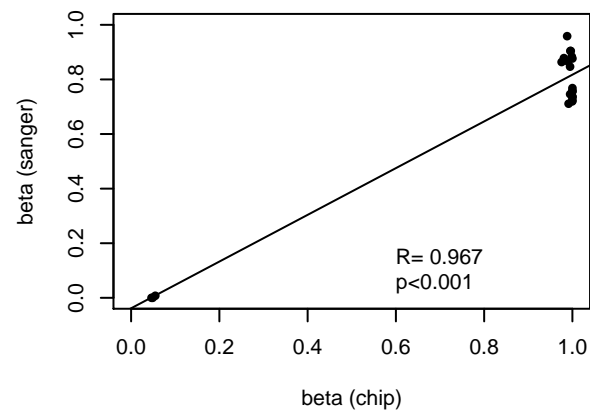

Supplement: 13059_2016_1091_MOESM1_ESM.pdf [file 13059_2016_1091_MOESM1_ESM.pdf]
